# Supplementary material for: Variations in Proline Content, Polyamine Profiles, and Antioxidant Capacities among Different Provenances of European Beech (Fagus sylvatica L.)
Source: MDPI journal article supplement (doi:10.3390/antiox13020227), 2024-02-12
Supplement: s1 [file s1]

**Table S1.** Data on European beech (*Fagus sylvatica* L.) provenances in the study.

| Code | Provenance                  | Country                   | Alt | Lat    | Long   | T    | P    | EQ   |
|------|-----------------------------|---------------------------|-----|--------|--------|------|------|------|
| HR24 | Sjeverni Dilj<br>Čaglinski  | Croatia                   | 398 | 45°17′ | 18°01′ | 11.9 | 753  | 29.2 |
| HR25 | Vrani Kamen                 | Croatia                   | 432 | 45°37′ | 17°19′ | 11.1 | 840  | 25.2 |
| BA30 | Tajan                       | Bosnia and<br>Herzegovina | 706 | 44°23′ | 18°03′ | 9.6  | 972  | 20.1 |
| HU42 | Valkonya                    | Hungary                   | 217 | 46°30′ | 16°45′ | 11.3 | 784  | 27.4 |
| DE47 | Schelkingen                 | Germany                   | 675 | 47°59′ | 09°59′ | 9.3  | 952  | 19.6 |
| DE48 | Höllerbach                  | Germany                   | 597 | 49°01′ | 13°14′ | 7.4  | 816  | 20.7 |
| DE49 | Hasbruch                    | Germany                   | 30  | 53°08′ | 08°26′ | 9.6  | 772  | 22.9 |
| AT56 | Scharnstein,<br>Mitterndorf | Austria                   | 536 | 47°54′ | 13°58′ | 6.4  | 1473 | 10.4 |
| BA60 | Tešanj, Crni<br>Vrh         | Bosnia and<br>Herzegovina | 507 | 44°33′ | 17°59′ | 10.9 | 957  | 21.9 |
| BA61 | Bosanska<br>Krupa           | Bosnia and<br>Herzegovina | 537 | 44°46′ | 16°16′ | 9.8  | 1254 | 15.6 |
| RS68 | Fruška Gora                 | Serbia                    | 370 | 45°10′ | 19°55′ | 11.0 | 782  | 27.4 |

**Legend:** Alt – altitude (m a.s.l.); Lat – latitude (N); Long – longitude (E); T – mean annual temperature (°C); P – annual sum of precipitation (mm); EQ – Ellenberg's climate quotient.

**Supplementary material S2.** General information and physical properties of the soil are presented for the soil depth of 30 cm.

## SOIL PROPERTIES

### General information\*

Soil type: Cambisol

Organic carbon density: to 236 hg/m<sup>3</sup>

Soil organic carbon stock: 52 t/ha

### Physical properties\*

Bulk density: 126 cg/cm<sup>3</sup>

Clay content: 214 g/kg

Coarse fragment: 148 cm<sup>3</sup>/dm<sup>3</sup>

Sand content: 461 g/kg

Silt content: 325 g/kg

Volume water content at -10 kPa: 367 10<sup>-2</sup> cm<sup>3</sup>/cm<sup>3</sup>

Volume water content at -33 kPa: 270 10<sup>-2</sup> cm<sup>3</sup>/cm<sup>3</sup>

Volume water content at -1500 kPa: 139 10<sup>-2</sup> cm<sup>3</sup>/cm<sup>3</sup>

### Chemical properties:

Cation exchange capacity (at Ph 7): 164 mmol(c)/kg

Nitrogen content: 178 cg/kg

Soil organic carbon content: 194 dg/kg

pH value: 5.2
